# Supplementary material
Source: MDPI journal article supplement (https://www.mdpi.com/1999-4907/15/2/250)
Supplement: s1 [file s1]

**Table S1.** Physical soil parameters (mean  $\pm$  standard error) in seasonally flooded forest and upland forest. Values based on n = 9 samples for each forest type.

|                                             | Seasonally Flooded Forest | Upland Forest      |
|---------------------------------------------|---------------------------|--------------------|
| Soil type                                   | Gleysol                   | Leptosol           |
| Soil color (moist)                          | 7.5YR4/1                  | 10YR2/1            |
| Sand (%)                                    | 26.44 $\pm$ 1.33          | 56.58 $\pm$ 1.50   |
| Silt (%)                                    | 61.88 $\pm$ 1.99          | 28.39 $\pm$ 1.29   |
| Clay (%)                                    | 11.68 $\pm$ 0.96          | 15.01 $\pm$ 0.90   |
| P (mg $\cdot$ kg <sup>-1</sup> )            | 4.17 $\pm$ 0.35           | 5.98 $\pm$ 0.63    |
| pH (H <sub>2</sub> O)                       | 6.93 $\pm$ 0.23           | 7.86 $\pm$ 0.05    |
| C (%)                                       | 5.48 $\pm$ 0.20           | 10.81 $\pm$ 0.31   |
| N (%)                                       | 0.32 $\pm$ 0.03           | 0.96 $\pm$ 0.05    |
| K (mg $\cdot$ kg <sup>-1</sup> )            | 508.39 $\pm$ 24.60        | 394.20 $\pm$ 38.52 |
| K (Cmol $\cdot$ kg <sup>-1</sup> )          | 1.30 $\pm$ 0.06           | 1.01 $\pm$ 0.09    |
| C.E.C. (Cmol $\cdot$ kg <sup>-1</sup> )     | 52.34 $\pm$ 2.91          | 46.39 $\pm$ 0.99   |
| Bulk density (gr $\cdot$ mL <sup>-1</sup> ) | 1.02 $\pm$ 0.01           | 0.81 $\pm$ 0.01    |

**Table S2.** Description of topographic variables (mean  $\pm$  standard error) of seasonally flooded forest and upland forest in the Calakmul region of the southern Yucatan Peninsula.

|           | Seasonally Flooded Forest | Upland Forest      |
|-----------|---------------------------|--------------------|
| Aspect    | 40.36 $\pm$ 10.04         | 115.88 $\pm$ 12.18 |
| Elevation | 85 $\pm$ 5.15             | 136.2 $\pm$ 6.71   |
| Roughness | 0.33 $\pm$ 0.06           | 1.44 $\pm$ 0.15    |
| Slope     | 0.79 $\pm$ 0.21           | 3.78 $\pm$ 0.40    |
| TPI       | 1.49 $\pm$ 2.98           | 0.61 $\pm$ 1.98    |
| TRI       | 68.02 $\pm$ 7.89          | 53.93 $\pm$ 6.18   |
| TWI       | 8.43 $\pm$ 0.17           | 6.20 $\pm$ 0.16    |
